# Supplementary material
Source: ML conference proceedings conference paper supplement (https://proceedings.mlr.press/v119/marx20a.html)
Supplement: Supplementary file 1 [file marx20a-supp.pdf]

## A Omitted Proofs

**Proof of Proposition 1.** We use the Triangle Inequality to bound the distance between the vector of predictions of the baseline model and the predictions of a competing model in the  $\epsilon$ -level set. Let  $y = \{y_i\}_{i=1}^n$  be the vector of labels, let  $\hat{y} = \{h_0(x_i)\}_{i=1}^n$  be the vector of predictions of the baseline model, and let  $y' = \{h'(x_i)\}_{i=1}^n$  be the predictions of a competing model  $h'$  in the  $\epsilon$ -level set. Note that  $y, y', \hat{y} \in \{+1, -1\}^n$ . Now, we can express the risk of the baseline model  $\hat{R}(h_0)$ , the risk of the competing model  $\hat{R}(h')$ , and the discrepancy between  $h$  and  $h'$ , denoted  $\delta(h_0, h')$ , in terms of these three vectors by

$$\begin{aligned}\hat{R}(h_0) &= \frac{1}{4} \|y - \hat{y}\| \\ \hat{R}(h') &= \frac{1}{4} \|y - y'\| \\ \delta(h_0, h') &= \frac{1}{4} \|y' - \hat{y}\|\end{aligned}$$

Next, consider the triangle formed in  $\mathbb{R}^n$  by the points  $y, y'$  and  $\hat{y}$ , with side lengths  $\|y - \hat{y}\|$ ,  $\|y' - \hat{y}\|$  and  $\|y - y'\|$ . The Triangle Inequality gives us that

$$\|y' - \hat{y}\| \leq \|y - y'\| + \|y - \hat{y}\|.$$

Substituting using the three equations above, we have

$$\delta(h_0, h') \leq \hat{R}(h_0) + \hat{R}(h').$$

Since  $h' \in S_\epsilon(h_0)$ , we have by the definition of the  $\epsilon$ -level set that  $\hat{R}(h') \leq \hat{R}(h_0) + \epsilon$ . We can then rewrite the above expression to yield

$$\delta(h_0, h') \leq 2\hat{R}(h_0) + \epsilon$$

Recall that  $\delta_\epsilon(h_0) := \max_{h' \in S_\epsilon(h_0)} \delta(h_0, h')$ . Since each  $h' \in S_\epsilon(h_0)$  satisfies  $\delta(h_0, h') \leq 2\hat{R}(h_0) + \epsilon$ , we have the result that  $\delta_\epsilon(h_0) \leq 2\hat{R}(h_0) + \epsilon$ .  $\square$

## B MIP Formulation for Training the Best Linear Classifier

We fit a classifier that minimizes the training error by solving an optimization problem of the form:

$$\min_{h \in \mathcal{H}} \sum_{i=1}^n \mathbb{1}[h(\mathbf{x}_i) \neq y_i] \quad (5)$$

We solve this optimization problem via the following MIP formulation:

$$\begin{aligned} \min \quad & \sum_{i=0}^n l_i \\ \text{s.t.} \quad & M_i l_i \geq y_i \left( \gamma - \sum_{j=0}^d w_j x_{ij} \right) \quad i = 1, \dots, n \end{aligned} \quad (6a)$$

$$\gamma \leq -h_0(\mathbf{x}_j) \sum_{j=0}^d w_j x_{ij} \quad (6b)$$

$$1 = l_i + l_{i'} \quad (i, i') \in K \quad (6c)$$

$$w_j = w_j^+ + w_j^- \quad j = 0, \dots, d \quad (6d)$$

$$1 = \sum_{j=0}^d (w_j^+ - w_j^-) \quad (6e)$$

$$l_i \in \{0, 1\} \quad i = 1, \dots, n$$

$$w_j \in [-1, 1] \quad j = 0, \dots, d$$

$$w_j^+ \in [0, 1] \quad j = 0, \dots, d$$

$$w_j^- \in [-1, 0] \quad j = 0, \dots, d$$

Here, constraints (6a) set the mistake indicators  $l_i \leftarrow \mathbb{1}[h(\mathbf{x}_i) \neq y_i]$ . These constraints depend on: (i) a margin parameter  $\gamma > 0$ , which should be set to a small positive number (e.g.,  $\gamma = 10^{-4}$ ); and (ii) the ‘‘Big-M’’ parameters  $M_i$  which can be set as  $M_i = \gamma + \max_{\mathbf{x}_i \in X} \|\mathbf{x}_i\|_\infty$  since we have fixed  $\|\mathbf{w}\|_1 = 1$  in constraint (6e). Constraint (6c) produces an improved lower bound by encoding the necessary condition that any classifier must make exactly one mistake between any two points  $(i, i') \in K$  with identical features  $\mathbf{x}_i = \mathbf{x}_{i'}$  and conflicting labels. Here,  $K = \{(i, i') : \mathbf{x}_i = \mathbf{x}_{i'}, y_i = +1, y_{i'} = -1\}$  is the set of points with conflicting labels.

### C Additional Experimental Results

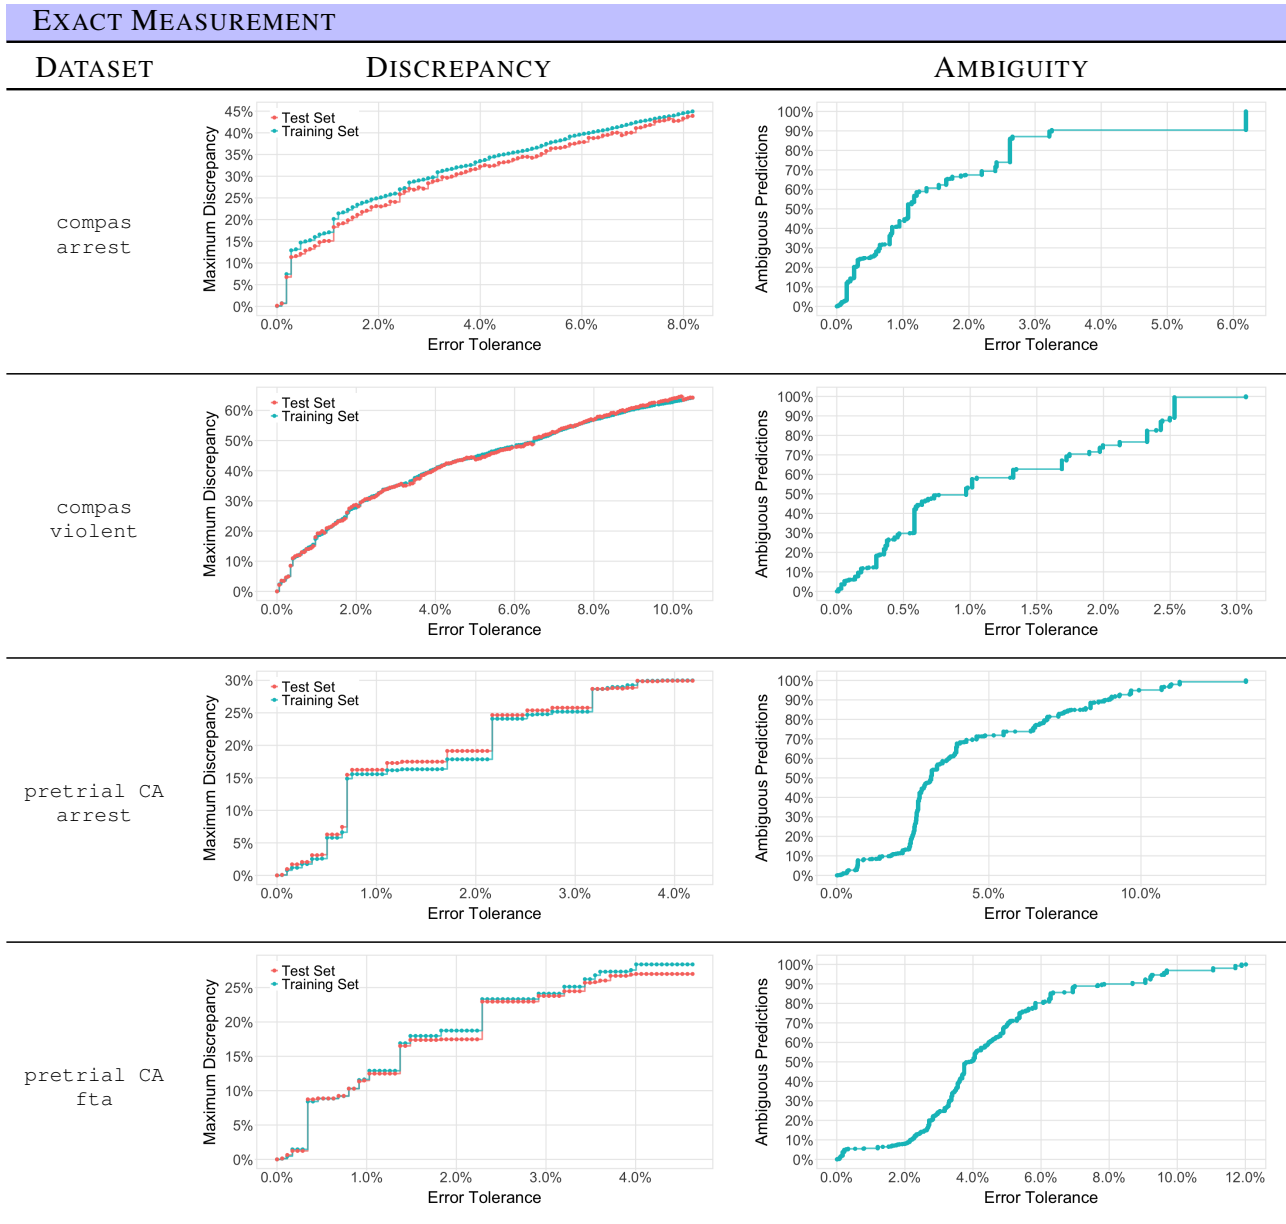

Figure 4. Multiplicity profiles for the compas and pretrial datasets.

Predictive Multiplicity in Classification

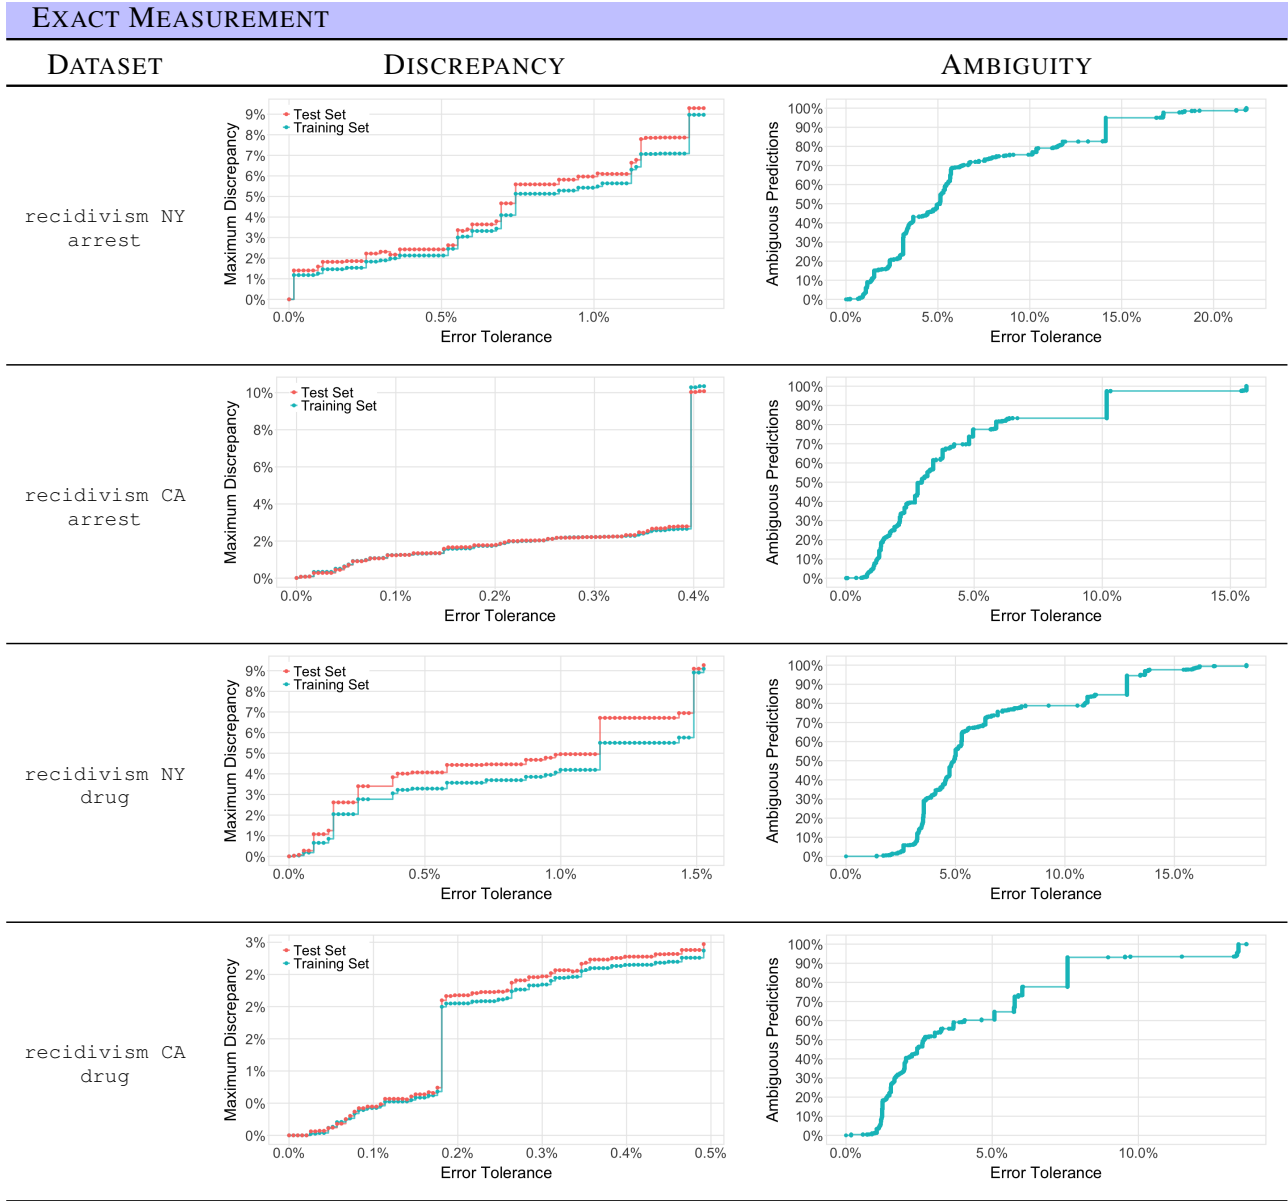

Figure 5. Multiplicity profiles for the recidivism datasets.

# Predictive Multiplicity in Classification

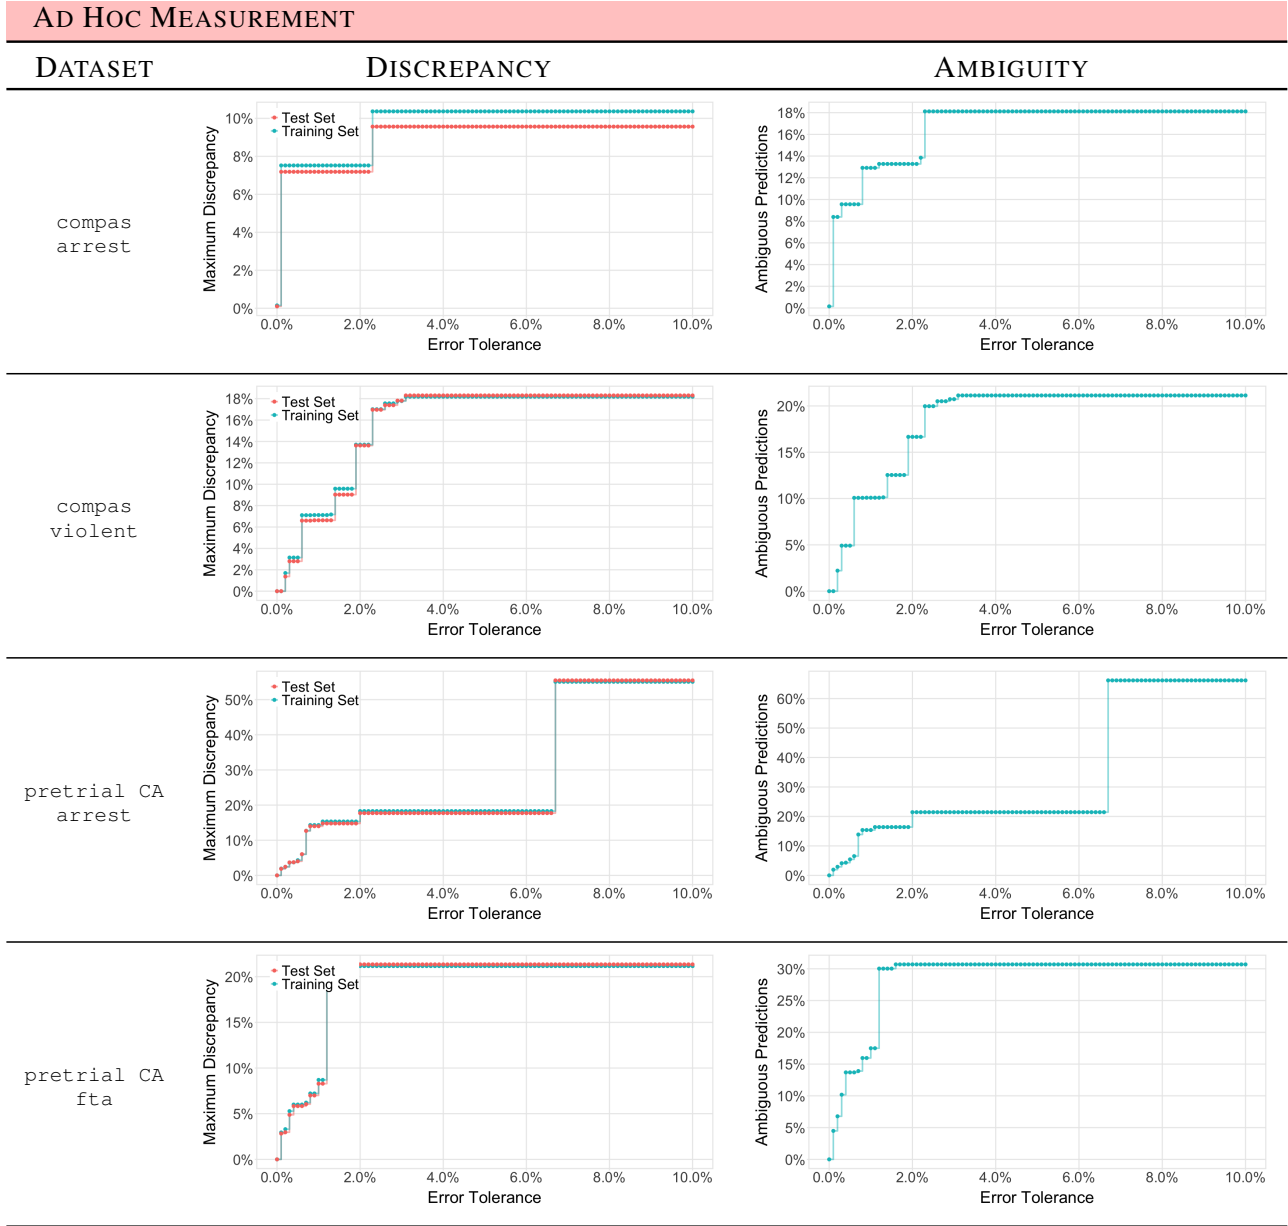

Figure 6. Multiplicity profiles for the `compas` and `pretrial` datasets produced via pools of logistic regression models.

Predictive Multiplicity in Classification

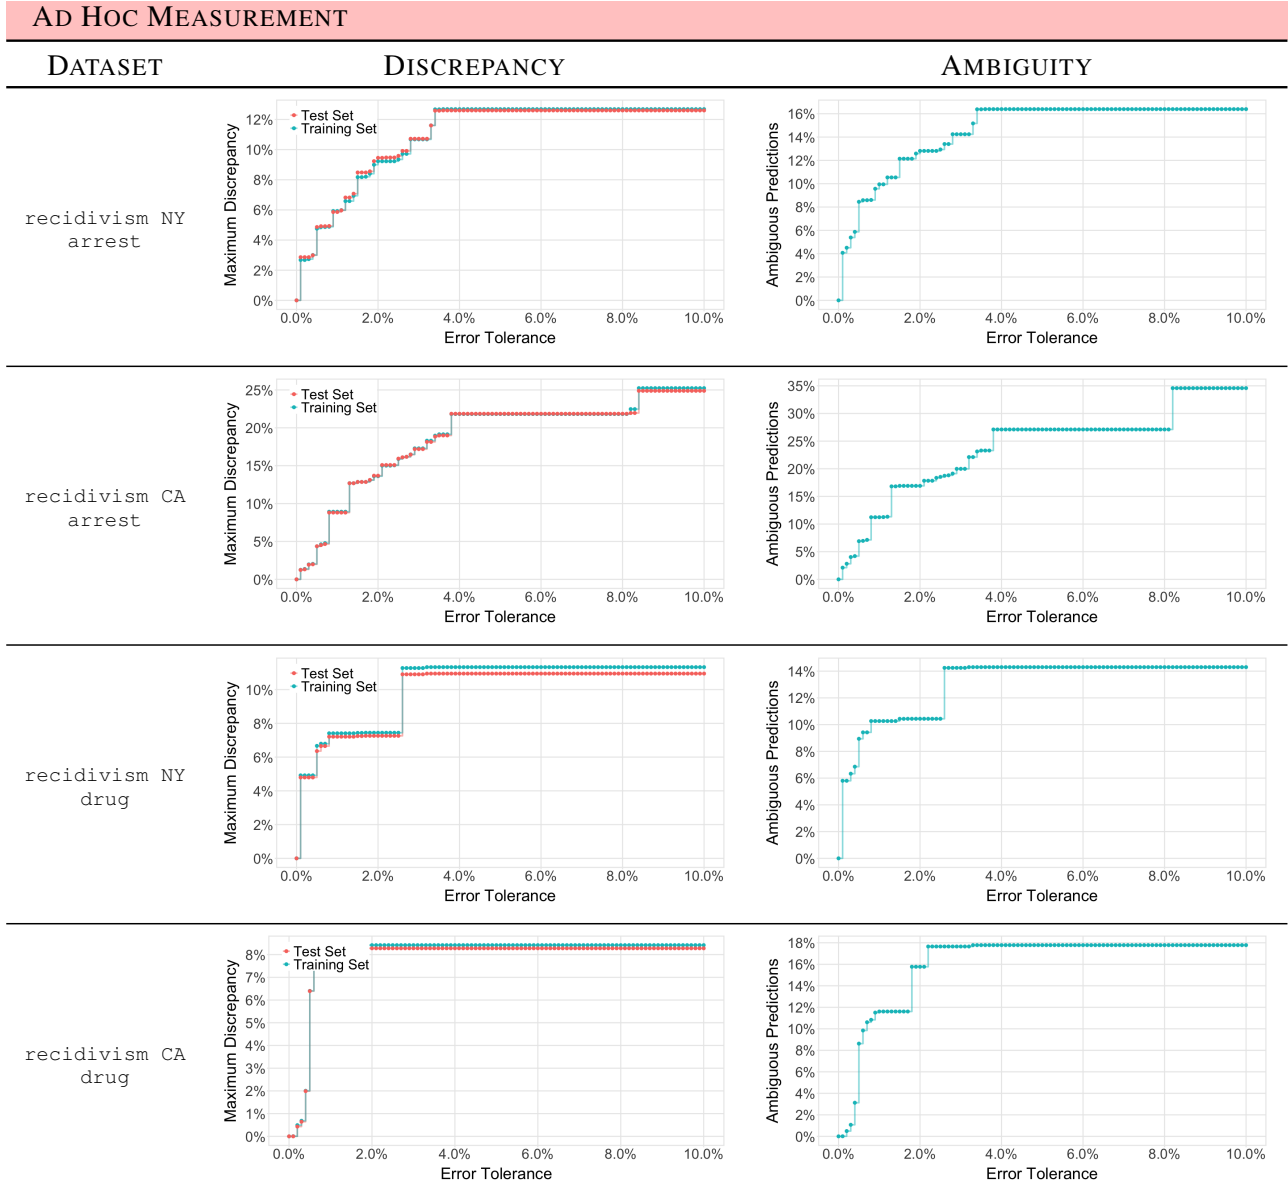

Figure 7. Multiplicity profiles for the recidivism datasets produced via pools of logistic regression models.
